# Supplementary material for: Effects of Telemedicine and mHealth on Systolic Blood Pressure Management in Stroke Patients: Systematic Review and Meta-Analysis of Randomized Controlled Trials
Source: PubMed Central journal article supplement (PMC8235282; doi:10.2196/24116), 2021-06-11
Supplement: mhealth_v9i6e24116_app1.pdf [file mhealth_v9i6e24116_app1.pdf]

## **Pubmed 3082**

stroke[MESH] OR brain infarction[MESH] OR transient ischemic attack[MESH] OR cerebral hemorrhage[MESH] OR subarachnoid hemorrhage[MESH]

stroke\* OR cerebrovascular accident\* OR CVA OR CVAs OR apoplexy OR brain vascular accident\* OR brain infarction OR cerebral infarction OR transient ischemic attack\* OR TIAs OR TIA OR cerebral hemorrhage\* OR cerebrum hemorrhage\* OR cerebral parenchymal hemorrhage\* OR cerebral brain hemorrhage\* OR cerebral bleeding or intracerebral hemorrhage\* OR ICH OR ICHs OR intracerebral bleeding OR subarachnoid hemorrhage\* OR SAH OR SAHs OR subarachnoid bleeding

Mobile Applications[MESH] OR Telemedicine[MESH] OR Text Messaging[MESH] OR Cell Phone[MESH] OR Smartphone[MESH] OR Social Media[MESH] OR internet[MESH]

mobile OR Portable Software Application OR Tele\* OR mHealth OR eHealth OR e-health OR m-Health OR ?phone\* OR Text\* OR Short Message OR SMS OR app OR apps OR digital\* OR web\* OR internet\* OR ?media OR wireless OR computer OR video\* OR Bluetooth OR Blog\* OR online OR electronic OR MP3 player OR MP4 player OR WeChat OR WhatsApp OR Twitter OR virtual reality OR interactive

voice response OR Facebook OR networking

blood pressure[MESH] OR hypertension[MESH]

blood pressure OR BP OR hypertens\* OR bloodpressure OR Systolic

blood pressure OR SBP OR Pulse Pressure OR PP

### **Cochran library 1656**

stroke[MESH] OR brain infarction[MESH] OR transient ischemic  
attack[MESH] OR cerebral hemorrhage[MESH] OR subarachnoid  
hemorrhage[MESH]

stroke\* OR “cerebrovascular accident\*” OR CVA OR CVAs OR  
apoplexy OR “brain vascular accident\*” OR “brain infarction” OR  
“cerebral infarction” OR “transient ischemic attack\*” OR TIAs OR TIA  
OR “cerebral hemorrhage\*” OR “cerebrum hemorrhage\*” OR “cerebral  
parenchymal hemorrhage\*” OR “cerebral brain hemorrhage\*” OR  
“cerebral bleeding” or “intracerebral hemorrhage\*” OR ICH OR ICHs  
OR “intracerebral bleeding” OR “subarachnoid hemorrhage\*” OR SAH  
OR SAHs OR “subarachnoid bleeding”

Mobile Applications[MESH] OR Telemedicine[MESH] OR Text  
Messaging[MESH] OR Cell Phone[MESH] OR Smartphone[MESH]  
OR Social Media[MESH] OR internet[MESH]

mobile OR “Portable Software Application” OR Tele\* OR mHealth OR eHealth OR e-health OR m-Health OR ?phone\* OR Text\* OR “Short Message” OR SMS OR app OR apps OR digital\* OR web\* OR internet\* OR ?media OR wireless OR computer OR video\* OR Bluetooth OR Blog\* OR online OR electronic OR “MP3 player” OR “MP4 player” OR WeChat OR WhatsApp OR Twitter OR “virtual reality” OR “interactive voice response” OR Facebook OR networking

blood pressure[MESH] OR hypertension[MESH]

“blood pressure” OR BP OR hypertens\* OR bloodpressure OR “Systolic blood pressure” OR SBP OR “Pulse Pressure” OR PP

### **Web of science 3338**

stroke\* OR “cerebrovascular accident\*” OR CVA OR CVAs OR apoplexy OR “brain vascular accident\*” OR “brain infarction” OR “cerebral infarction” OR “transient ischemic attack\*” OR TIAs OR TIA OR “cerebral hemorrhage\*” OR “cerebrum hemorrhage\*” OR “cerebral parenchymal hemorrhage\*” OR “cerebral brain hemorrhage\*” OR “cerebral bleeding” or “intracerebral hemorrhage\*” OR ICH OR ICHs OR “intracerebral bleeding” OR “subarachnoid hemorrhage\*” OR SAH OR SAHs OR “subarachnoid bleeding”

mobile OR “Portable Software Application” OR Tele\* OR mHealth OR eHealth OR e-health OR m-Health OR ?phone\* OR Text\* OR “Short Message” OR SMS OR app OR apps OR digital\* OR web\* OR internet\* OR ?media OR wireless OR computer OR video\* OR Bluetooth OR Blog\* OR online OR electronic OR “MP3 player” OR “MP4 player” OR WeChat OR WhatsApp OR Twitter OR “virtual reality” OR “interactive voice response” OR Facebook OR networking

“blood pressure” OR BP OR hypertens\* OR bloodpressure OR “Systolic blood pressure” OR SBP OR “Pulse Pressure” OR PP

### **Embase 5922**

Stroke patient[MESH] OR brain ischemia[MESH] OR brain infarction[MESH] OR transient ischemic attack[MESH] OR brain hemorrhage[MESH] OR subarachnoid hemorrhage[MESH]

stroke\* OR cerebrovascular accident\* OR CVA OR CVAs OR apoplexy OR brain vascular accident\* OR brain infarction OR cerebral infarction OR transient ischemic attack\* OR TIAs OR TIA OR cerebral hemorrhage\* OR cerebrum hemorrhage\* OR cerebral parenchymal hemorrhage\* OR cerebral brain hemorrhage\* OR cerebral bleeding or intracerebral hemorrhage\* OR ICH OR ICHs OR intracerebral bleeding OR subarachnoid hemorrhage\* OR SAH OR SAHs OR subarachnoid

bleeding OR brain hemorrhage OR brain ischemia

Mobile Application[MESH] OR Telemedicine[MESH] OR Text  
Messaging[MESH] OR mobile Phone[MESH] OR Smartphone[MESH]  
OR Social Media[MESH] OR internet[MESH]

mobile OR Portable Software Application OR Tele\* OR mHealth OR  
eHealth OR e-health OR m-Health OR ?phone\* OR Text\* OR Short  
Message OR SMS OR app OR apps OR digital\* OR web\* OR internet\*  
OR ?media OR wireless OR computer OR video\* OR Bluetooth OR  
Blog\* OR online OR electronic OR MP3 player OR MP4 player OR  
WeChat OR WhatsApp OR Twitter OR virtual reality OR interactive  
voice response OR Facebook OR networking

blood pressure[MESH] OR hypertension[MESH]

blood pressure OR BP OR hypertens\* OR bloodpressure OR Systolic  
blood pressure OR Pulse Pressure OR PP
