# Supplementary material for: Effects of Telemedicine and mHealth on Systolic Blood Pressure Management in Stroke Patients: Systematic Review and Meta-Analysis of Randomized Controlled Trials
Source: PubMed Central journal article supplement (PMC8235282; doi:10.2196/24116), 2021-06-11
Supplement: mhealth_v9i6e24116_app2.pdf [file mhealth_v9i6e24116_app2.pdf]

Table 1. Characteristics of the 9 randomized controlled trials included in the study.

| Study                      | Country        | Study population                               | Mode of intervention              | Control           | Intervention frequency                | Number       |         | Age(Mean or median) |             | Sex(Female,%) |         | Δsystolic blood pressure(mmHg) |         |       |       |
|----------------------------|----------------|------------------------------------------------|-----------------------------------|-------------------|---------------------------------------|--------------|---------|---------------------|-------------|---------------|---------|--------------------------------|---------|-------|-------|
|                            |                |                                                |                                   |                   |                                       | Intervention | Control | Intervention        | Control     | Intervention  | Control | Intervention                   | Control |       |       |
| ADIE et al, 2010           | United Kingdom | Hypertensive stroke or TIA <sup>a</sup>        | Telephone                         | Usual care        | 7–10 days, 1, 2 and 4 months          | 29           | 27      | -                   | -           | -             | -       | 0.0                            | 19.5    | -3    | 15    |
| Hanley et al, 2015         | United Kingdom | Stroke or TIA                                  | Telephone                         | Usual care        | Daily                                 | 40           | 15      | 69.9 (12.6)         | 73.5 (11.7) | 32.5          | 60.0    | -10.2                          | 12.3    | -3.8  | 13.6  |
| Kerry et al, 2013          | United Kingdom | Hypertensive stroke or TIA                     | Telephone support                 | Usual care        | Daily for the first week, then weekly | 168          | 169     | 71.1(12.6)          | 72.6 (11.4) | 40.6          | 44.3    | -1.8                           | 21      | 0.9   | 20.5  |
| Lakshminarayan et al, 2018 | United States  | Ischemic stroke or intraparenchymal hemorrhage | Smart phone                       | Usual care        | Daily                                 | 26           | 24      | 63.1 (9.7)          | 68.3 (10.0) | 23.1          | 32.0    | -10.9                          | 14.2    | -5.1  | 16.2  |
| MacKenzie et al, 2013      | United States  | Stroke or TIA                                  | Telephone calls                   | Usual care        | Monthly                               | 29           | 27      | -                   | -           | 32.1          |         | 7.2                            | 165     | -16.8 | 20    |
| Sarfo et al, 2018          | Ghana          | Stroke                                         | Smart phone                       | Standardized care | -                                     | 30           | 30      | 54.3(11.9)          | 55.9(13.7)  | 40            | 30      | -4.0                           | 27      | -4.3  | 24.7  |
| Wan et al, 2018            | China          | Hypertensive ischemic stroke                   | Telephone, short-message services | Usual care        | Weekly                                | 80           | 78      | -                   | -           | 36.2          | 33.3    | -9.86                          | 15.18   | -1.38 | 20.77 |
| Wang et al, 2020           | China          | Hypertensive stroke                            | Telephone, short-message services | Usual care        | Weekly                                | 76           | 75      | -                   | -           | 34.2          | 33.3    | -10.8                          | 12.7    | -1.3  | 16.5  |
| Ögren et al, 2018          | Sweden         | Stroke or TIA                                  | Telephone                         | Usual care        | 4 weeks                               | 320          | 340     | 69.9                | 69.3        | 40.6          | 40.9    | -8.8                           | 19.5    | -3    | 20.8  |

<sup>a</sup>TIA: transient ischemic attack.
